# Supplementary material
Source: PubMed Central journal article supplement (PMC4205622)
Supplement: pnas.201416356SI.pdf [file pnas.201416356SI.pdf]

# Supporting Information

Ricklefs et al. 10.1073/pnas.1416356111

## SI Text

**S1. Avian Blood Samples.** Avian blood samples used in this analysis were obtained in the field from the locations listed in [Table S1](#).

**S2. Lineage Circumscription.** Genetically differentiated parasites recovered from different hosts in the same area were distinguished as different lineages. Genetically differentiated parasites recovered from the same host or hosts within a region were distinguished as separate lineages when other lineages from different hosts inserted between them phylogenetically. Allopatric lineages in the same host or hosts were distinguished as different lineages when the genetic difference between them was

in the range of other lineage distinctions (1). In the absence of multiple independent genetic markers, one has to accept a certain level of uncertainty in these lineage designations, but there are few ambiguities in this dataset. [Table S2](#) lists the lineages considered in this analysis. Phylogenetic relationships among these lineages are shown in Fig. S1.

**S3. Nodes Analyzed in this Study.** In [Table S3](#), each node was designated as either sympatric or allopatric depending on whether the descendant lineages occurred in the same place (individual West Indian islands or larger continental areas). We also distinguished the host taxonomic difference between the descendant lineages at each node.

1. Ricklefs RE, et al. (2005) Community relationships of avian malaria parasites in southern Missouri. *Ecol Monogr* 75(4):543–559.
